# Supplementary material for: Appraisal of individual hydrogen bond strengths and cooperativity in ammonia clustersviaa molecular tailoring approach
Source: Royal Society of Chemistry journal article supplement (doi:10.1039/d1cp02839a), 2021-01-01
Supplement: d1cp02839a1.pdf [file d1cp02839a1.pdf]

## Supporting Information

### Appraisal of Individual Hydrogen Bond Strengths and Cooperativity in Ammonia Clusters via Molecular Tailoring Approach

Mini Bharati Ahirwar,<sup>†</sup> Deepak Patkar,<sup>†</sup> Itee Yadav<sup>†</sup> and Milind M. Deshmukh<sup>†\*</sup>

<sup>†</sup>Department of Chemistry, Dr. Harisingh Gour Vishwavidyalaya  
(A Central University), Sagar, 470003, India.

---

**Table S1:** Molecular energies (in a.u.) of various species in the MTA calculation of ammonia tetramer,  $(\text{NH}_3)_4$  at MP2(full)/aug-cc-pvTZ level of theory. See text for details.

| Species                                    | Energy       |
|--------------------------------------------|--------------|
| Ammonia Tetramer ( $E_m$ )                 | -225.940105  |
| Fragment F1 ( $E_{F1}$ )                   | -169.446144  |
| Fragment F2 ( $E_{F2}$ )                   | -169.446144  |
| Fragment F3 ( $E_{F3}$ )                   | -112.9603633 |
| Ammonia dimer ( $E_{N1\dots N2}^{dimer}$ ) | -112.9603633 |
| Ammonia monomer ( $E_{N1}$ )               | -56.477293   |
| Ammonia monomer ( $E_{N2}$ )               | -56.477293   |

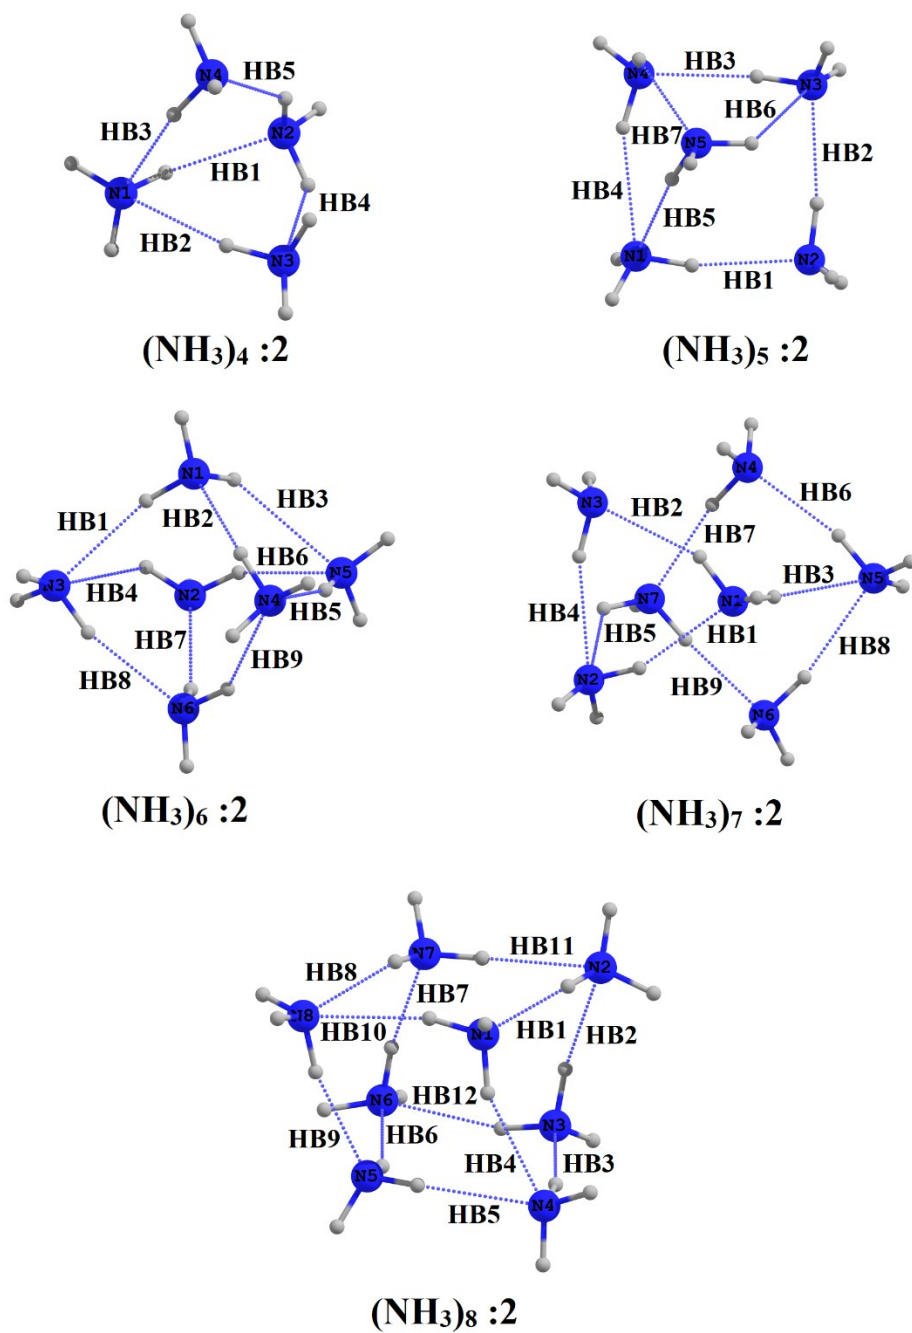

**Figure S1:** The MP2-optimized geometries of various ammonia clusters  $(\text{NH}_3)_n:2$ . Also see Figures 1 and S2.

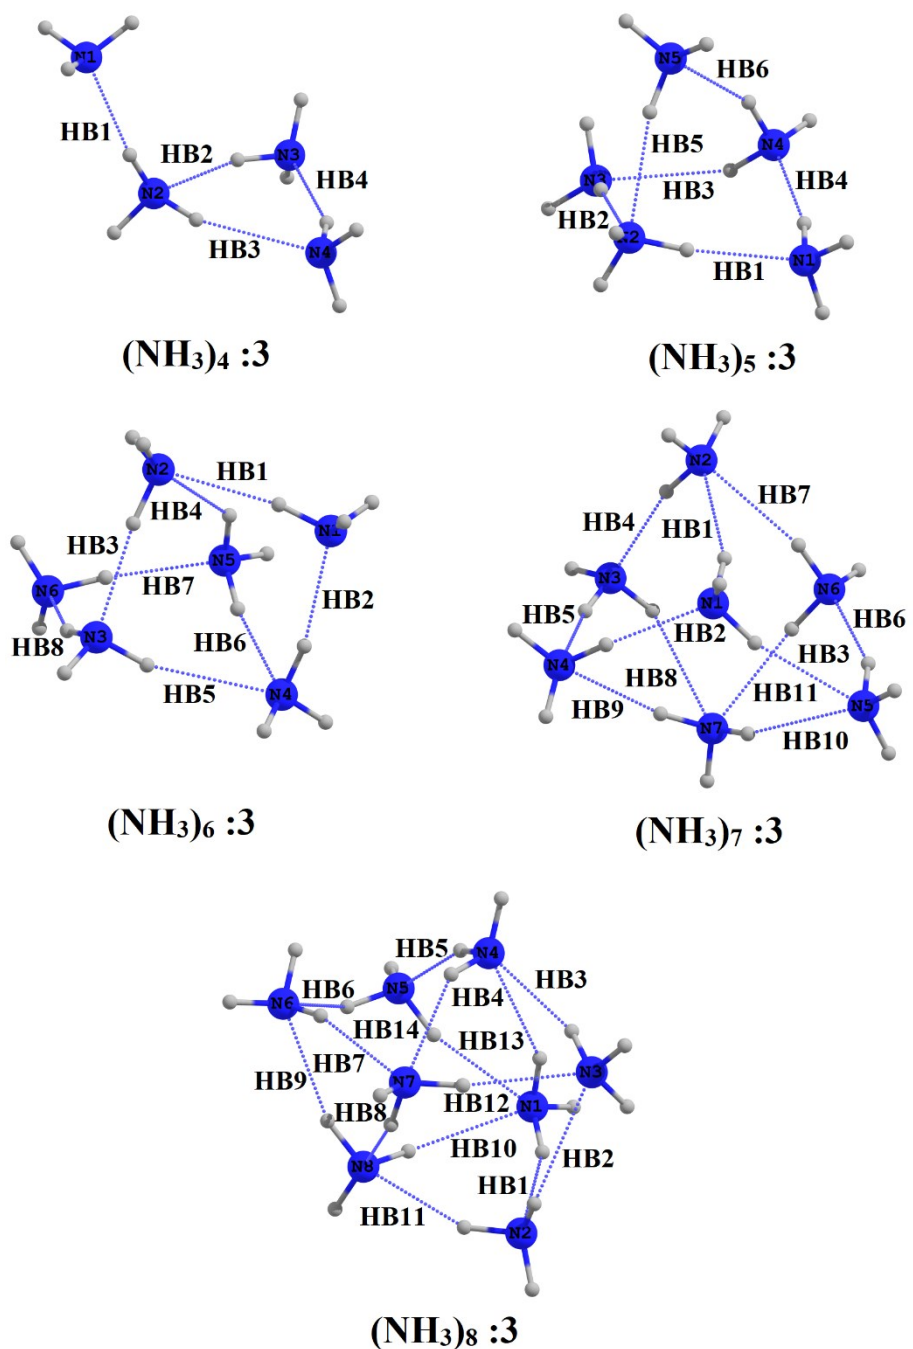

**Figure S2:** The MP2-optimized geometries of various ammonia clusters (NH<sub>3</sub>)<sub>n</sub>:3. Also see Figures 1 and S1.

**Table S2:** The HB energies in ammonia clusters  $(\text{NH}_3)_n:1$   $n=7, 8$ , calculated at MP2(full)/aug-cc-pVTZ level, along with the cooperativity contribution.

| HB label                              | HB Distance (in Å) | HB Angles (in degrees) | HB energy byMTA (in kcal/mol) | HB energy in Dimer (in kcal/mol) | Cooperativity (in kcal/mol) |
|---------------------------------------|--------------------|------------------------|-------------------------------|----------------------------------|-----------------------------|
| <b><math>(\text{NH}_3)_7:1</math></b> |                    |                        |                               |                                  |                             |
| HB1                                   | 2.12               | 170                    | 5.32                          | 3.56                             | 1.76                        |
| HB2                                   | 2.30               | 160                    | 3.94                          | 3.34                             | 0.60                        |
| HB3                                   | 2.30               | 160                    | 3.94                          | 3.34                             | 0.60                        |
| HB4                                   | 2.28               | 161                    | 3.90                          | 3.38                             | 0.53                        |
| HB5                                   | 2.12               | 158                    | 5.01                          | 3.51                             | 1.50                        |
| HB6                                   | 2.12               | 158                    | 5.01                          | 3.51                             | 1.50                        |
| HB7                                   | 2.28               | 161                    | 3.90                          | 3.38                             | 0.53                        |
| HB8                                   | 2.39               | 162                    | 3.79                          | 3.14                             | 0.65                        |
| HB9                                   | 2.45               | 140                    | 3.70                          | 3.19                             | 0.51                        |
| HB10                                  | 2.45               | 140                    | 3.70                          | 3.19                             | 0.51                        |
| HB11                                  | 2.39               | 162                    | 3.79                          | 3.14                             | 0.65                        |
| <b><math>(\text{NH}_3)_8:1</math></b> |                    |                        |                               |                                  |                             |
| HB1                                   | 2.30               | 163                    | 4.00                          | 3.36                             | 0.64                        |
| HB2                                   | 2.30               | 163                    | 4.00                          | 3.36                             | 0.64                        |
| HB3                                   | 2.30               | 163                    | 4.00                          | 3.36                             | 0.64                        |
| HB4                                   | 2.30               | 163                    | 4.00                          | 3.36                             | 0.64                        |
| HB5                                   | 2.10               | 169                    | 5.34                          | 3.53                             | 1.81                        |
| HB6                                   | 2.30               | 163                    | 4.00                          | 3.36                             | 0.64                        |
| HB7                                   | 2.30               | 163                    | 4.00                          | 3.36                             | 0.64                        |
| HB8                                   | 2.30               | 163                    | 4.00                          | 3.36                             | 0.64                        |
| HB9                                   | 2.30               | 163                    | 4.00                          | 3.36                             | 0.64                        |
| HB10                                  | 2.10               | 169                    | 5.34                          | 3.53                             | 1.81                        |
| HB11                                  | 2.10               | 169                    | 5.34                          | 3.53                             | 1.81                        |
| HB12                                  | 2.10               | 169                    | 5.34                          | 3.53                             | 1.81                        |

**Table S3:** The HB energies in the second most stable conformers of ammonia clusters,  $(\text{NH}_3)_n:2$  ( $n=3-8$ ) calculated at MP2(full)/aug-cc-pVTZ level of theory, along with cooperativity contribution.

| HB label                              | HB Distance (in Å) | HB Angles (in degrees) | HB energy with MTA (in kcal/mol) | HB energy in Dimer (in kcal/mol) | Cooperativity (in kcal/mol) |
|---------------------------------------|--------------------|------------------------|----------------------------------|----------------------------------|-----------------------------|
| <b><math>(\text{NH}_3)_4:2</math></b> |                    |                        |                                  |                                  |                             |
| HB1                                   | 2.15               | 150                    | 4.84                             | 3.44                             | 1.41                        |
| HB2                                   | 2.42               | 151                    | 3.54                             | 3.09                             | 0.45                        |
| HB3                                   | 2.29               | 158                    | 3.94                             | 3.21                             | 0.73                        |
| HB4                                   | 2.43               | 129                    | 2.67                             | 2.39                             | 0.28                        |
| HB5                                   | 2.42               | 140                    | 3.76                             | 3.21                             | 0.55                        |
| <b><math>(\text{NH}_3)_5:2</math></b> |                    |                        |                                  |                                  |                             |
| HB1                                   | 2.13               | 167                    | 5.04                             | 3.59                             | 1.45                        |
| HB2                                   | 2.15               | 170                    | 5.02                             | 3.59                             | 1.44                        |
| HB3                                   | 2.13               | 165                    | 4.86                             | 3.34                             | 1.51                        |
| HB4                                   | 2.34               | 157                    | 3.79                             | 3.00                             | 0.79                        |
| HB5                                   | 2.39               | 168                    | 2.17                             | 2.31                             | -0.13                       |
| HB6                                   | 2.84               | 124                    | 2.53                             | 2.19                             | 0.35                        |
| HB7                                   | 2.47               | 120                    | 1.65                             | 1.70                             | -0.04                       |
| <b><math>(\text{NH}_3)_6:2</math></b> |                    |                        |                                  |                                  |                             |
| HB1                                   | 2.22               | 163                    | 4.32                             | 3.58                             | 0.73                        |
| HB2                                   | 2.13               | 158                    | 4.87                             | 3.49                             | 1.37                        |
| HB3                                   | 2.57               | 137                    | 3.49                             | 2.96                             | 0.53                        |
| HB4                                   | 2.58               | 137                    | 3.33                             | 2.76                             | 0.57                        |
| HB5                                   | 2.25               | 165                    | 4.31                             | 3.35                             | 0.96                        |
| HB6                                   | 2.27               | 153                    | 3.84                             | 3.45                             | 0.38                        |
| HB7                                   | 2.22               | 150                    | 3.55                             | 3.07                             | 0.48                        |
| HB8                                   | 2.16               | 159                    | 4.86                             | 3.47                             | 1.39                        |
| HB9                                   | 2.42               | 147                    | 3.31                             | 3.10                             | 0.20                        |
| <b><math>(\text{NH}_3)_7:2</math></b> |                    |                        |                                  |                                  |                             |
| HB1                                   | 2.17               | 152                    | 4.92                             | 3.64                             | 1.28                        |
| HB2                                   | 2.30               | 158                    | 4.27                             | 3.59                             | 0.68                        |
| HB3                                   | 2.42               | 176                    | 1.50                             | 2.04                             | -0.54                       |
| HB4                                   | 2.26               | 160                    | 4.56                             | 3.60                             | 0.97                        |
| HB5                                   | 2.57               | 129                    | 1.18                             | 1.59                             | -0.40                       |
| HB6                                   | 2.09               | 166                    | 5.19                             | 3.48                             | 1.70                        |
| HB7                                   | 2.15               | 168                    | 4.99                             | 3.60                             | 1.39                        |
| HB8                                   | 2.21               | 168                    | 4.55                             | 3.47                             | 1.07                        |
| HB9                                   | 2.19               | 168                    | 4.73                             | 3.57                             | 1.16                        |
| <b><math>(\text{NH}_3)_8:2</math></b> |                    |                        |                                  |                                  |                             |
| HB1                                   | 2.11               | 167                    | 5.19                             | 3.49                             | 1.70                        |
| HB2                                   | 2.30               | 156                    | 3.90                             | 3.40                             | 0.50                        |
| HB3                                   | 2.11               | 167                    | 5.19                             | 3.49                             | 1.70                        |
| HB4                                   | 2.30               | 156                    | 3.90                             | 3.40                             | 0.50                        |
| HB5                                   | 2.30               | 165                    | 2.29                             | 2.48                             | -0.19                       |
| HB6                                   | 2.30               | 156                    | 3.90                             | 3.40                             | 0.50                        |
| HB7                                   | 2.11               | 167                    | 5.19                             | 3.49                             | 1.70                        |
| HB8                                   | 2.30               | 156                    | 3.90                             | 3.40                             | 0.50                        |
| HB9                                   | 2.11               | 167                    | 5.19                             | 3.49                             | 1.70                        |
| HB10                                  | 2.30               | 165                    | 2.29                             | 2.48                             | -0.19                       |
| HB11                                  | 2.30               | 165                    | 2.29                             | 2.48                             | -0.19                       |
| HB12                                  | 2.30               | 165                    | 2.29                             | 2.48                             | -0.19                       |

**Table S4:** The HB energies in the third most stable conformers of ammonia clusters,  $(\text{NH}_3)_n:3$  ( $n=3-8$ ) calculated at MP2(full)/aug-cc-pVTZ level of theory, along with cooperativity contribution.

| HB label                              | HB Distance (in Å) | HB Angles (in degrees) | HB energy with MTA (in kcal/mol) | HB energy in Dimer (in kcal/mol) | Cooperativity (in kcal/mol) |
|---------------------------------------|--------------------|------------------------|----------------------------------|----------------------------------|-----------------------------|
| <b><math>(\text{NH}_3)_4:3</math></b> |                    |                        |                                  |                                  |                             |
| HB1                                   | 2.27               | 172                    | 3.49                             | 3.60                             | -0.11                       |
| HB2                                   | 2.16               | 157                    | 5.11                             | 3.65                             | 1.47                        |
| HB3                                   | 2.30               | 151                    | 4.37                             | 3.61                             | 0.76                        |
| HB4                                   | 2.22               | 157                    | 4.86                             | 3.68                             | 1.18                        |
| <b><math>(\text{NH}_3)_5:3</math></b> |                    |                        |                                  |                                  |                             |
| HB1                                   | 2.11               | 169                    | 5.42                             | 3.55                             | 1.88                        |
| HB2                                   | 2.33               | 165                    | 3.63                             | 3.12                             | 0.51                        |
| HB3                                   | 2.36               | 137                    | 2.48                             | 2.30                             | 0.18                        |
| HB4                                   | 2.10               | 166                    | 5.31                             | 3.54                             | 1.77                        |
| HB5                                   | 2.25               | 168                    | 3.62                             | 3.01                             | 0.61                        |
| HB6                                   | 2.28               | 152                    | 3.84                             | 3.35                             | 0.49                        |
| <b><math>(\text{NH}_3)_6:3</math></b> |                    |                        |                                  |                                  |                             |
| HB1                                   | 2.18               | 169                    | 4.81                             | 3.48                             | 1.33                        |
| HB2                                   | 2.14               | 167                    | 5.03                             | 3.61                             | 1.41                        |
| HB3                                   | 2.10               | 169                    | 5.19                             | 3.35                             | 1.84                        |
| HB4                                   | 2.55               | 136                    | 3.01                             | 2.61                             | 0.40                        |
| HB5                                   | 2.37               | 159                    | 3.23                             | 2.83                             | 0.40                        |
| HB6                                   | 2.30               | 165                    | 2.76                             | 2.58                             | 0.18                        |
| HB7                                   | 2.17               | 164                    | 4.81                             | 3.59                             | 1.22                        |
| HB8                                   | 2.21               | 157                    | 3.73                             | 3.13                             | 0.60                        |
| <b><math>(\text{NH}_3)_7:3</math></b> |                    |                        |                                  |                                  |                             |
| HB1                                   | 2.31               | 159                    | 3.95                             | 3.37                             | 0.58                        |
| HB2                                   | 2.10               | 167                    | 5.24                             | 3.49                             | 1.76                        |
| HB3                                   | 2.29               | 165                    | 2.41                             | 2.49                             | -0.07                       |
| HB4                                   | 2.12               | 166                    | 5.08                             | 3.56                             | 1.51                        |
| HB5                                   | 2.25               | 161                    | 4.34                             | 3.43                             | 0.90                        |
| HB6                                   | 2.12               | 156                    | 4.99                             | 3.44                             | 1.56                        |
| HB7                                   | 2.33               | 165                    | 2.40                             | 2.48                             | -0.08                       |
| HB8                                   | 2.73               | 120                    | 0.65                             | 1.06                             | -0.41                       |
| HB9                                   | 2.37               | 164                    | 1.95                             | 2.29                             | -0.33                       |
| HB10                                  | 2.41               | 153                    | 3.75                             | 3.13                             | 0.62                        |
| HB11                                  | 2.31               | 147                    | 3.87                             | 3.42                             | 0.45                        |
| <b><math>(\text{NH}_3)_8:3</math></b> |                    |                        |                                  |                                  |                             |
| HB1                                   | 2.21               | 157                    | 4.07                             | 3.38                             | 0.69                        |
| HB2                                   | 2.53               | 132                    | 3.02                             | 2.85                             | 0.17                        |
| HB3                                   | 2.22               | 159                    | 4.47                             | 3.44                             | 1.03                        |
| HB4                                   | 2.42               | 151                    | 3.87                             | 3.23                             | 0.64                        |
| HB5                                   | 2.20               | 160                    | 4.18                             | 3.35                             | 0.83                        |
| HB6                                   | 2.52               | 133                    | 3.03                             | 2.88                             | 0.15                        |
| HB7                                   | 2.25               | 159                    | 4.39                             | 3.42                             | 0.97                        |
| HB8                                   | 2.31               | 151                    | 4.17                             | 3.46                             | 0.71                        |
| HB9                                   | 2.31               | 156                    | 4.06                             | 3.47                             | 0.59                        |
| HB10                                  | 2.34               | 154                    | 4.15                             | 3.37                             | 0.78                        |
| HB11                                  | 2.35               | 149                    | 3.99                             | 3.32                             | 0.67                        |
| HB12                                  | 2.29               | 160                    | 4.15                             | 3.46                             | 0.69                        |
| HB13                                  | 2.31               | 150                    | 4.03                             | 3.37                             | 0.66                        |
| HB14                                  | 2.39               | 148                    | 3.92                             | 3.35                             | 0.57                        |

**Table S5:** Error in the estimation of total energy of the second most stable conformer (NH<sub>3</sub>)<sub>n</sub>:2 at MP2(full)/aug-cc-pVTZ level of theory. See text for details

| Ammonia Clusters                   | $\sum E_{HB\ddagger}$<br>(in a.u.) | $\sum E_{monomers}^{\ddagger}$<br>(in a.u.) | $E_{calculated}^a$<br>(in a.u.) | $E_{actual}$<br>(in a.u.) | Error<br>(in a.u.) | Error<br>(in kcal/mol) | Error per H-bond<br>(in kcal/mol) |
|------------------------------------|------------------------------------|---------------------------------------------|---------------------------------|---------------------------|--------------------|------------------------|-----------------------------------|
| (NH <sub>3</sub> ) <sub>4</sub> :2 | 0.02988                            | -225.90932                                  | -225.93919                      | -225.93608                | 0.003112           | 1.95                   | 0.39                              |
| (NH <sub>3</sub> ) <sub>5</sub> :2 | 0.03995                            | -282.38647                                  | -282.42642                      | -282.42570                | 0.000729           | 0.46                   | 0.07                              |
| (NH <sub>3</sub> ) <sub>6</sub> :2 | 0.05715                            | -338.86383                                  | -338.92098                      | -338.91528                | 0.005699           | 3.58                   | 0.40                              |
| (NH <sub>3</sub> ) <sub>7</sub> :2 | 0.05718                            | -395.34111                                  | -395.39830                      | -395.40498                | -0.006680          | -4.19                  | -0.47                             |
| (NH <sub>3</sub> ) <sub>8</sub> :2 | 0.07252                            | -451.81824                                  | -451.89076                      | -451.89626                | -0.005502          | -3.45                  | -0.29                             |

$$^a E(\text{calculated}) = \sum E_{monomers} - \sum E_{HB}$$

$\ddagger \sum E_{HB}$  is sum of HB energy by MTA.  $\sum E_{HB}$  is subtracted from sum of monomers energy is because of by definition  $E_{HB}$  is taken as positive.

$\ddagger$  Monomer energies were calculated from the respective monomer geometries as in the clusters.

**Table S6:** Error in the estimation of total energy of the third most stable conformer (NH<sub>3</sub>)<sub>n</sub>:3 at MP2(full)/aug-cc-pVTZ level of theory. See text for details

| Ammonia Clusters                   | $\sum E_{HB\ddagger}$<br>(in a.u.) | $\sum E_{monomers}^{\ddagger}$<br>(in a.u.) | $E_{calculated}^a$<br>(in a.u.) | $E_{actual}$<br>(in a.u.) | Error<br>(in a.u.) | Error<br>(kcal/mol) | Error per H-bond<br>(kcal/mol) |
|------------------------------------|------------------------------------|---------------------------------------------|---------------------------------|---------------------------|--------------------|---------------------|--------------------------------|
| (NH <sub>3</sub> ) <sub>4</sub> :3 | 0.02842                            | -225.90933                                  | -225.93775                      | -225.93397                | 0.003775           | 2.37                | 0.59                           |
| (NH <sub>3</sub> ) <sub>5</sub> :3 | 0.03873                            | -282.38648                                  | -282.42521                      | -282.42558                | -0.000377          | -0.24               | -0.08                          |
| (NH <sub>3</sub> ) <sub>6</sub> :3 | 0.05188                            | -338.86372                                  | -338.91560                      | -338.91541                | 0.000190           | 0.12                | 0.02                           |
| (NH <sub>3</sub> ) <sub>7</sub> :3 | 0.06158                            | -395.34103                                  | -395.40261                      | -395.40542                | -0.002808          | -1.76               | -0.16                          |
| (NH <sub>3</sub> ) <sub>8</sub> :3 | 0.07578                            | -451.81857                                  | -451.89436                      | -451.89538                | -0.001022          | -0.64               | -0.05                          |

$$^a E(\text{calculated}) = \sum E_{monomers} - \sum E_{HB}$$



¶  $\sum E_{HB}$  is sum of HB energy by MTA.  $\sum E_{HB}$  is subtracted from sum of monomers energy is because of by definition  $E_{HB}$  is taken as positive.

‡ Monomer energies were calculated from the respective monomer geometries as in the clusters.

**Table S7:** The comparison of sum of hydrogen bond energy and the dissociation energy ( $\Delta E$ )<sup>#</sup> in  $(\text{NH}_3)_n:m$  ( $n=3$  to 8 and  $m=1,3$ ) calculated at MP2(full)/aug-cc-pVTZ level.

| <b>Ammonia Cluster</b> | <b>Sum of HB Energy by<br/>MTA</b> | <b>Dissociation Energy (<math>\Delta E</math>)</b> |
|------------------------|------------------------------------|----------------------------------------------------|
| $(\text{NH}_3)_3:1$    | 14.55                              | 11.84                                              |
| $(\text{NH}_3)_4:1$    | 20.52                              | 18.91                                              |
| $(\text{NH}_3)_5:1$    | 24.88                              | 24.24                                              |
| $(\text{NH}_3)_6:1$    | 31.98                              | 31.03                                              |
| $(\text{NH}_3)_7:1$    | 46.00                              | 39.59                                              |
| $(\text{NH}_3)_8:1$    | 56.36                              | 48.13                                              |
| $(\text{NH}_3)_4:2$    | 18.75                              | 16.39                                              |
| $(\text{NH}_3)_5:2$    | 25.06                              | 24.00                                              |
| $(\text{NH}_3)_6:2$    | 35.88                              | 31.58                                              |
| $(\text{NH}_3)_7:2$    | 35.89                              | 39.24                                              |
| $(\text{NH}_3)_8:2$    | 45.52                              | 47.90                                              |
| $(\text{NH}_3)_4:3$    | 17.83                              | 15.07                                              |
| $(\text{NH}_3)_5:3$    | 24.30                              | 23.92                                              |
| $(\text{NH}_3)_6:3$    | 32.57                              | 31.66                                              |
| $(\text{NH}_3)_7:3$    | 38.63                              | 39.52                                              |
| $(\text{NH}_3)_8:3$    | 55.50                              | 47.34                                              |

<sup>#</sup>  $\Delta E = n \cdot E_{\text{monomer}} - E_{\text{cluster}}$ . Here,  $n$  is number of monomers in a cluster.

$E_{\text{cluster}}$  and  $E_{\text{monomer}}$  are the energies of a clusters and the free monomer, respectively.

**Cartesian Coordinates of Ammonia Clusters Optimized at MP2/6-31++G(d,p) level of theory along with Single point energy at MP2(full)/aug-cc-pVTZ level**

**(NH<sub>3</sub>)<sub>3</sub>: 1**

**MP2(full)/aug-cc-pVTZ = -169.45134 a.u.**

|   |              |              |              |
|---|--------------|--------------|--------------|
| N | -0.727259000 | 1.677926000  | -0.000011000 |
| H | -1.073226000 | 2.174029000  | 0.813451000  |
| H | -1.144814000 | 0.747171000  | -0.000070000 |
| H | -1.073274000 | 2.174162000  | -0.813372000 |
| N | 1.816773000  | -0.209147000 | 0.000020000  |
| H | 2.419656000  | -0.157526000 | 0.813285000  |
| H | 1.219490000  | 0.617841000  | 0.000086000  |
| H | 2.419273000  | -0.157650000 | -0.813537000 |
| N | -1.089508000 | -1.468777000 | -0.000003000 |
| H | -1.346166000 | -2.016554000 | -0.813392000 |
| H | -1.346314000 | -2.016415000 | 0.813432000  |
| H | -0.074668000 | -1.365074000 | 0.000079000  |

**((NH<sub>3</sub>)<sub>4</sub>: 1**

**MP2(full)/aug-cc-pVTZ = -225.94010 a.u.**

|   |              |              |              |
|---|--------------|--------------|--------------|
| N | 2.134740000  | -0.618723000 | -0.151696000 |
| H | 2.805893000  | -0.922624000 | 0.545324000  |
| H | 2.549015000  | -0.822702000 | -1.054751000 |
| H | 1.305745000  | -1.209996000 | -0.056885000 |
| N | -0.618721000 | -2.134731000 | 0.151697000  |
| H | -1.210002000 | -1.305742000 | 0.056889000  |
| H | -0.822690000 | -2.549011000 | 1.054752000  |
| H | -0.922617000 | -2.805886000 | -0.545325000 |
| N | -2.134741000 | 0.618716000  | -0.151696000 |
| H | -2.549021000 | 0.822692000  | -1.054750000 |
| H | -1.305747000 | 1.209989000  | -0.056890000 |
| H | -2.805891000 | 0.922622000  | 0.545326000  |
| N | 0.618722000  | 2.134739000  | 0.151696000  |
| H | 0.922627000  | 2.805887000  | -0.545329000 |
| H | 1.209990000  | 1.305741000  | 0.056888000  |
| H | 0.822705000  | 2.549018000  | 1.054749000  |

**(NH<sub>3</sub>)<sub>5</sub>: 1**

**MP2(full)/aug-cc-pVTZ = -282.42609 a.u.**

|   |              |              |              |
|---|--------------|--------------|--------------|
| N | 2.148530000  | -0.781362000 | 0.964641000  |
| H | 1.839127000  | -0.554926000 | 1.903526000  |
| H | 3.020593000  | -1.289640000 | 1.062369000  |
| H | 1.460839000  | -1.423309000 | 0.563333000  |
| N | -0.076250000 | -2.496942000 | -0.458428000 |
| H | -0.901442000 | -1.903219000 | -0.343140000 |
| H | -0.329824000 | -3.427812000 | -0.145345000 |
| H | 0.104595000  | -2.569729000 | -1.453879000 |
| N | -2.533337000 | -0.548740000 | -0.020680000 |
| H | -3.159642000 | -0.434650000 | -0.810541000 |
| H | -2.116913000 | 0.366886000  | 0.166431000  |
| H | -3.119714000 | -0.776587000 | 0.775216000  |
| N | -1.105717000 | 2.226533000  | 0.511881000  |
| H | -0.861578000 | 2.392600000  | 1.482406000  |
| H | -1.554625000 | 3.074350000  | 0.182212000  |
| H | -0.228101000 | 2.126277000  | -0.004035000 |
| N | 1.588532000  | 1.612729000  | -0.996322000 |
| H | 2.359049000  | 2.265974000  | -1.085638000 |
| H | 1.439083000  | 1.214307000  | -1.916893000 |
| H | 1.896249000  | 0.853954000  | -0.383662000 |

**(NH<sub>3</sub>)<sub>6</sub>: 1**

**MP2(full)/aug-cc-pVTZ = -338.91440 a.u.**

|   |              |              |              |
|---|--------------|--------------|--------------|
| N | -1.440681000 | -0.741528000 | -1.693160000 |
| H | -1.518983000 | -1.128188000 | -0.752695000 |
| H | -0.586597000 | -1.118516000 | -2.090397000 |
| H | -2.211285000 | -1.102329000 | -2.245289000 |
| N | 1.440792000  | 1.095555000  | -1.488680000 |
| H | 1.519087000  | 0.087758000  | -1.353303000 |
| H | 2.211429000  | 1.393314000  | -2.077164000 |
| H | 0.586737000  | 1.251081000  | -2.013825000 |
| N | 1.440798000  | -1.837019000 | -0.204354000 |
| H | 0.586741000  | -2.369581000 | -0.076529000 |
| H | 1.519031000  | -1.215880000 | 0.600741000  |
| H | 2.211440000  | -2.495532000 | -0.167925000 |
| N | -1.440792000 | -1.095558000 | 1.488676000  |
| H | -1.519084000 | -0.087761000 | 1.353300000  |
| H | -0.586741000 | -1.251086000 | 2.013827000  |
| H | -2.211433000 | -1.393318000 | 2.077153000  |
| N | -1.440802000 | 1.837017000  | 0.204352000  |
| H | -0.586747000 | 2.369584000  | 0.076527000  |
| H | -2.211447000 | 2.495526000  | 0.167923000  |
| H | -1.519031000 | 1.215878000  | -0.600743000 |
| N | 1.440684000  | 0.741533000  | 1.693166000  |
| H | 2.211288000  | 1.102334000  | 2.245296000  |
| H | 0.586600000  | 1.118520000  | 2.090402000  |
| H | 1.518988000  | 1.128194000  | 0.752701000  |

**(NH<sub>3</sub>)<sub>7</sub>: 1**

**MP2(full)/aug-cc-pVTZ = -395.40553 a.u.**

|   |              |              |              |
|---|--------------|--------------|--------------|
| N | -0.000010000 | 2.133193000  | -1.499358000 |
| H | -0.811861000 | 2.550783000  | -1.942808000 |
| H | 0.811834000  | 2.550789000  | -1.942814000 |
| H | -0.000007000 | 1.136262000  | -1.736344000 |
| N | -0.000002000 | -0.982290000 | -1.845757000 |
| H | -0.821273000 | -1.286201000 | -1.325920000 |
| H | 0.821272000  | -1.286200000 | -1.325921000 |
| H | -0.000002000 | -1.490641000 | -2.723794000 |
| N | -2.821501000 | -1.251285000 | -0.226263000 |
| H | -3.436018000 | -1.772137000 | 0.390702000  |
| H | -3.299765000 | -1.190095000 | -1.119049000 |
| H | -2.736328000 | -0.303132000 | 0.148814000  |
| N | -1.827794000 | 1.355673000  | 1.101098000  |
| H | -1.238191000 | 0.771442000  | 1.688035000  |
| H | -2.223550000 | 2.085028000  | 1.683658000  |
| H | -1.209703000 | 1.802785000  | 0.427119000  |
| N | 1.827797000  | 1.355681000  | 1.101085000  |
| H | 1.209700000  | 1.802789000  | 0.427109000  |
| H | 1.238201000  | 0.771452000  | 1.688030000  |
| H | 2.223557000  | 2.085040000  | 1.683638000  |
| N | 2.821503000  | -1.251282000 | -0.226265000 |
| H | 2.736331000  | -0.303126000 | 0.148803000  |
| H | 3.299757000  | -1.190100000 | -1.119058000 |
| H | 3.436030000  | -1.772125000 | 0.390698000  |
| N | 0.000005000  | -1.341010000 | 1.613079000  |
| H | 0.000007000  | -2.022729000 | 2.364789000  |
| H | 0.815345000  | -1.535319000 | 1.035487000  |
| H | -0.815334000 | -1.535323000 | 1.035488000  |

**(NH<sub>3</sub>)<sub>8</sub>: 1**  
**MP2(full)/aug-cc-pVTZ = -451.89663 a.u.**

|   |              |              |              |
|---|--------------|--------------|--------------|
| N | -2.109504000 | 1.726363000  | 1.261954000  |
| H | -3.067935000 | 1.462392000  | 1.466698000  |
| H | -2.040322000 | 2.717953000  | 1.467270000  |
| H | -1.966549000 | 1.609821000  | 0.253791000  |
| N | 1.125441000  | 1.375173000  | 1.703012000  |
| H | 1.494154000  | 1.825752000  | 2.533881000  |
| H | 1.376005000  | 0.390004000  | 1.761470000  |
| H | 0.110179000  | 1.426298000  | 1.761222000  |
| N | 2.108586000  | -1.726831000 | 1.262704000  |
| H | 2.039121000  | -2.718481000 | 1.467634000  |
| H | 3.066912000  | -1.463068000 | 1.468204000  |
| H | 1.966354000  | -1.609927000 | 0.254480000  |
| N | -1.126643000 | -1.375777000 | 1.701985000  |
| H | -1.377238000 | -0.390629000 | 1.760664000  |
| H | -1.495891000 | -1.826680000 | 2.532440000  |
| H | -0.111418000 | -1.426924000 | 1.760821000  |
| N | -1.726176000 | -2.108774000 | -1.263200000 |
| H | -2.717715000 | -2.039302000 | -1.468666000 |
| H | -1.462345000 | -3.067145000 | -1.468405000 |
| H | -1.609804000 | -1.966380000 | -0.254937000 |
| N | 1.376054000  | -1.125773000 | -1.702266000 |
| H | 1.427226000  | -0.110523000 | -1.760647000 |
| H | 1.827031000  | -1.494655000 | -2.532845000 |
| H | 0.390907000  | -1.376324000 | -1.761153000 |
| N | 1.727100000  | 2.109242000  | -1.261454000 |
| H | 2.718791000  | 2.039848000  | -1.466211000 |
| H | 1.609979000  | 1.966501000  | -0.253327000 |
| H | 1.463409000  | 3.067680000  | -1.466528000 |
| N | -1.374845000 | 1.126394000  | -1.702733000 |
| H | -0.389667000 | 1.376983000  | -1.760941000 |
| H | -1.825319000 | 1.495521000  | -2.533475000 |
| H | -1.425962000 | 0.111162000  | -1.761451000 |

**(NH<sub>3</sub>)<sub>4</sub>: 2****MP2(full)/aug-cc-pVTZ = -225.93608 a.u.**

|   |              |              |              |
|---|--------------|--------------|--------------|
| N | -0.540719000 | -1.476443000 | 1.149284000  |
| H | -1.406509000 | -1.975887000 | 1.322649000  |
| H | 0.175604000  | -1.951239000 | 1.688557000  |
| H | -0.304517000 | -1.587434000 | 0.160923000  |
| N | 0.360852000  | -0.769719000 | -1.712072000 |
| H | 1.271592000  | -0.495550000 | -1.353536000 |
| H | -0.218096000 | 0.065716000  | -1.678320000 |
| H | 0.472403000  | -1.039906000 | -2.682217000 |
| N | 1.785119000  | 0.858567000  | 0.598655000  |
| H | 2.443538000  | 1.156136000  | 1.308760000  |
| H | 1.023180000  | 0.370880000  | 1.059965000  |
| H | 1.392712000  | 1.689186000  | 0.170686000  |
| N | -1.538968000 | 1.349978000  | -0.111810000 |
| H | -1.490417000 | 2.207915000  | 0.425936000  |
| H | -1.320551000 | 0.578498000  | 0.515810000  |
| H | -2.502937000 | 1.245008000  | -0.407615000 |

**(NH<sub>3</sub>)<sub>5</sub>: 2****MP2(full)/aug-cc-pVTZ = -282.42570 a.u.**

|   |              |              |              |
|---|--------------|--------------|--------------|
| N | -0.695861000 | -2.082414000 | 0.623687000  |
| H | -1.349458000 | -1.303387000 | 0.511691000  |
| H | -0.646568000 | -2.294974000 | 1.614717000  |
| H | -1.107452000 | -2.896768000 | 0.179967000  |
| N | -2.327672000 | 0.546283000  | 0.107120000  |
| H | -2.730764000 | 0.627561000  | -0.820182000 |
| H | -1.527573000 | 1.181638000  | 0.150901000  |
| H | -3.027442000 | 0.893148000  | 0.754353000  |
| N | 0.339132000  | 2.224858000  | 0.387285000  |
| H | 0.961515000  | 1.469942000  | 0.687205000  |
| H | 0.261446000  | 2.878168000  | 1.159892000  |
| H | 0.822723000  | 2.721976000  | -0.353680000 |
| N | 2.092005000  | -0.330166000 | 0.822992000  |
| H | 1.400711000  | -1.074589000 | 0.874670000  |
| H | 2.888799000  | -0.597665000 | 1.389391000  |
| H | 2.389201000  | -0.301601000 | -0.147985000 |
| N | 0.689731000  | -0.365669000 | -1.944432000 |
| H | 0.309274000  | -1.006834000 | -1.253222000 |
| H | 0.505775000  | -0.746423000 | -2.865152000 |
| H | 0.168461000  | 0.499557000  | -1.859133000 |



**(NH<sub>3</sub>)<sub>6</sub>: 2**

**MP2(full)/aug-cc-pVTZ = -338.91528 a.u.**

|   |              |              |              |
|---|--------------|--------------|--------------|
| N | 0.312385000  | 0.866601000  | -1.928297000 |
| H | 0.651877000  | -0.089536000 | -1.886221000 |
| H | 0.272922000  | 1.135124000  | -2.905177000 |
| H | -0.642142000 | 0.868001000  | -1.568780000 |
| N | -1.213243000 | -2.045925000 | -0.268723000 |
| H | -0.234603000 | -2.015823000 | -0.547384000 |
| H | -1.693292000 | -1.294945000 | -0.754398000 |
| H | -1.607360000 | -2.923008000 | -0.588799000 |
| N | -2.404279000 | 1.128626000  | -0.248908000 |
| H | -2.545947000 | 2.130089000  | -0.328901000 |
| H | -1.905557000 | 0.953217000  | 0.626192000  |
| H | -3.326545000 | 0.716718000  | -0.151967000 |
| N | 1.915155000  | 1.599688000  | 0.621652000  |
| H | 1.422616000  | 1.616884000  | -0.275041000 |
| H | 2.835776000  | 2.000911000  | 0.477086000  |
| H | 1.423147000  | 2.226300000  | 1.250079000  |
| N | 1.953334000  | -1.534851000 | -0.209514000 |
| H | 1.947964000  | -2.200686000 | 0.556404000  |
| H | 2.021435000  | -0.605303000 | 0.205158000  |
| H | 2.812105000  | -1.695836000 | -0.725402000 |
| N | -0.604489000 | -0.012173000 | 2.052063000  |
| H | -0.684751000 | -0.150091000 | 3.053107000  |
| H | 0.365836000  | 0.207486000  | 1.846950000  |
| H | -0.825510000 | -0.893265000 | 1.589190000  |

**(NH<sub>3</sub>)<sub>7</sub>: 2**

**MP2(full)/aug-cc-pVTZ = -395.40498 a.u.**

|   |              |              |              |
|---|--------------|--------------|--------------|
| N | 0.079424000  | 0.236460000  | 1.908837000  |
| H | 0.599083000  | -0.602764000 | 1.656600000  |
| H | -0.833045000 | 0.171819000  | 1.465894000  |
| H | -0.076180000 | 0.213657000  | 2.911057000  |
| N | 2.374318000  | 1.524615000  | 0.193279000  |
| H | 1.597521000  | 1.360743000  | 0.836154000  |
| H | 3.125397000  | 1.963727000  | 0.714830000  |
| H | 2.061292000  | 2.198722000  | -0.496971000 |
| N | 2.234180000  | -1.694252000 | 0.456099000  |
| H | 2.027129000  | -2.165734000 | -0.417703000 |
| H | 3.068475000  | -2.127925000 | 0.836656000  |
| H | 2.467061000  | -0.729075000 | 0.224696000  |
| N | -1.025340000 | -2.260197000 | -0.512089000 |
| H | -1.297802000 | -3.061439000 | -1.071275000 |
| H | -0.379117000 | -2.596372000 | 0.194559000  |
| H | -0.498358000 | -1.621362000 | -1.112307000 |
| N | -3.031258000 | -0.125833000 | 0.499082000  |
| H | -3.777954000 | 0.024663000  | -0.171683000 |
| H | -3.481617000 | -0.382006000 | 1.371663000  |
| H | -2.492718000 | -0.936639000 | 0.179153000  |
| N | -1.118511000 | 2.274851000  | -0.463434000 |
| H | -1.804131000 | 1.617693000  | -0.090342000 |
| H | -1.624047000 | 3.086016000  | -0.803675000 |
| H | -0.562053000 | 2.582368000  | 0.327265000  |
| N | 0.489115000  | 0.029494000  | -2.078444000 |
| H | -0.043773000 | 0.809958000  | -1.689465000 |
| H | 0.458158000  | 0.114245000  | -3.089276000 |
| H | 1.453186000  | 0.183746000  | -1.799136000 |

**(NH<sub>3</sub>)<sub>8</sub>: 2**

**MP2(full)/aug-cc-pVTZ = -451.89626 a.u.**

|   |              |              |              |
|---|--------------|--------------|--------------|
| N | 1.148330000  | -2.084689000 | 0.010668000  |
| H | 1.283427000  | -1.568777000 | -0.856539000 |
| H | 1.520234000  | -3.017432000 | -0.134688000 |
| H | 0.144280000  | -2.184349000 | 0.144848000  |
| N | 2.140591000  | -0.095341000 | 2.187823000  |
| H | 2.211711000  | -0.521316000 | 3.105980000  |
| H | 3.059210000  | 0.278552000  | 1.973037000  |
| H | 1.940404000  | -0.839790000 | 1.512882000  |
| N | 1.148337000  | 2.084685000  | -0.010671000 |
| H | 1.520246000  | 3.017426000  | 0.134685000  |
| H | 0.144288000  | 2.184350000  | -0.144849000 |
| H | 1.283434000  | 1.568773000  | 0.856537000  |
| N | 2.140588000  | 0.095336000  | -2.187825000 |
| H | 1.940403000  | 0.839786000  | -1.512884000 |
| H | 3.059207000  | -0.278559000 | -1.973040000 |
| H | 2.211708000  | 0.521311000  | -3.105982000 |
| N | -1.148335000 | -0.010668000 | -2.084684000 |
| H | -0.144287000 | -0.144849000 | -2.184350000 |
| H | -1.283428000 | 0.856536000  | -1.568764000 |
| H | -1.520244000 | 0.134698000  | -3.017424000 |
| N | -2.140586000 | 2.187831000  | 0.095339000  |
| H | -3.059207000 | 1.973050000  | -0.278554000 |
| H | -1.940402000 | 1.512889000  | 0.839789000  |
| H | -2.211700000 | 3.105988000  | 0.521314000  |
| N | -1.148332000 | 0.010671000  | 2.084686000  |
| H | -1.520238000 | -0.134685000 | 3.017429000  |
| H | -0.144283000 | 0.144847000  | 2.184347000  |
| H | -1.283432000 | -0.856536000 | 1.568774000  |
| N | -2.140593000 | -2.187825000 | -0.095338000 |
| H | -1.940408000 | -1.512885000 | -0.839788000 |
| H | -3.059212000 | -1.973041000 | 0.278557000  |
| H | -2.211711000 | -3.105983000 | -0.521312000 |

**(NH<sub>3</sub>)<sub>4</sub>: 3**

**MP2(full)/aug-cc-pVTZ = -225.93397 a.u.**

|   |              |              |              |
|---|--------------|--------------|--------------|
| N | -3.330840000 | -0.062771000 | 0.442178000  |
| H | -3.932424000 | 0.718558000  | 0.208667000  |
| H | -3.058247000 | 0.046709000  | 1.412054000  |
| H | -3.892759000 | -0.903796000 | 0.380352000  |
| N | -0.441691000 | 0.064164000  | -1.098729000 |
| H | -1.369220000 | -0.031511000 | -0.690399000 |
| H | 0.123241000  | -0.727395000 | -0.795480000 |
| H | -0.549283000 | -0.005683000 | -2.104415000 |
| N | 1.890320000  | 1.581699000  | 0.332849000  |
| H | 2.464085000  | 2.166181000  | -0.264573000 |
| H | 1.622201000  | 2.151504000  | 1.127214000  |
| H | 1.041660000  | 1.341784000  | -0.183886000 |
| N | 1.976961000  | -1.595148000 | 0.262485000  |
| H | 2.753866000  | -1.992265000 | -0.253335000 |
| H | 1.947880000  | -2.068094000 | 1.158430000  |
| H | 2.185754000  | -0.611602000 | 0.433887000  |

**(NH<sub>3</sub>)<sub>5</sub>: 3**

**MP2(full)/aug-cc-pVTZ = -282.42558 a.u.**

|   |              |              |              |
|---|--------------|--------------|--------------|
| N | -2.559960000 | -0.114417000 | -0.263497000 |
| H | -3.212218000 | -0.245656000 | 0.502118000  |
| H | -1.878512000 | -0.878405000 | -0.223929000 |
| H | -3.095340000 | -0.227989000 | -1.117608000 |
| N | -0.304684000 | 2.045427000  | -0.255844000 |
| H | -1.127535000 | 1.434740000  | -0.264253000 |
| H | -0.203775000 | 2.418204000  | -1.194754000 |
| H | -0.523807000 | 2.840729000  | 0.335788000  |
| N | 1.987606000  | -0.071293000 | -1.404516000 |
| H | 2.668136000  | -0.411399000 | -0.734893000 |
| H | 1.409198000  | 0.616552000  | -0.928735000 |
| H | 2.496839000  | 0.406299000  | -2.139017000 |
| N | -0.142009000 | -2.052515000 | -0.122060000 |
| H | 0.423045000  | -1.772454000 | -0.920522000 |
| H | -0.098081000 | -3.063142000 | -0.052713000 |
| H | 0.330017000  | -1.662086000 | 0.692065000  |
| N | 1.000550000  | 0.086921000  | 1.992895000  |
| H | 0.330578000  | 0.132002000  | 2.752570000  |
| H | 0.717433000  | 0.771597000  | 1.293736000  |
| H | 1.893510000  | 0.382144000  | 2.371301000  |

**(NH<sub>3</sub>)<sub>6</sub>: 3**

**MP2(full)/aug-cc-pVTZ = -338.91541 a.u.**

|   |              |              |              |
|---|--------------|--------------|--------------|
| N | 2.948206000  | -0.531780000 | 0.345813000  |
| H | 3.243923000  | -0.635141000 | 1.310603000  |
| H | 3.710163000  | -0.880357000 | -0.225904000 |
| H | 2.150071000  | -1.153648000 | 0.203156000  |
| N | 0.343110000  | -2.213198000 | -0.384504000 |
| H | -0.097695000 | -1.477961000 | -0.947345000 |
| H | -0.398188000 | -2.652173000 | 0.152437000  |
| H | 0.678798000  | -2.923922000 | -1.026877000 |
| N | -0.987466000 | 0.244440000  | -1.743953000 |
| H | -1.132062000 | 0.488659000  | -2.717457000 |
| H | -0.445481000 | 0.992377000  | -1.318704000 |
| H | -1.899711000 | 0.239303000  | -1.287608000 |
| N | 1.400343000  | 2.118960000  | -0.340143000 |
| H | 1.697075000  | 2.904965000  | 0.228798000  |
| H | 1.539663000  | 2.400020000  | -1.305185000 |
| H | 2.037351000  | 1.340927000  | -0.152695000 |
| N | -0.457825000 | 0.305293000  | 1.685869000  |
| H | -0.266253000 | 0.600842000  | 2.637126000  |
| H | -0.026871000 | 0.986646000  | 1.063063000  |
| H | 0.046031000  | -0.563060000 | 1.533724000  |
| N | -3.329382000 | 0.091793000  | 0.384191000  |
| H | -3.807214000 | -0.774695000 | 0.603919000  |
| H | -3.952662000 | 0.846931000  | 0.646438000  |
| H | -2.495835000 | 0.151726000  | 0.971599000  |

**(NH<sub>3</sub>)<sub>7</sub>: 3**

**MP2(full)/aug-cc-pVTZ = -395.40542 a.u.**

|   |              |              |              |
|---|--------------|--------------|--------------|
| N | -0.352090000 | 0.418144000  | 1.879527000  |
| H | -1.233477000 | 0.623385000  | 1.412744000  |
| H | -0.544914000 | 0.410487000  | 2.875777000  |
| H | -0.091185000 | -0.531436000 | 1.619466000  |
| N | 1.265364000  | -2.290210000 | 0.980775000  |
| H | 1.749607000  | -1.765376000 | 0.247300000  |
| H | 1.331605000  | -3.275907000 | 0.749041000  |
| H | 1.785850000  | -2.165822000 | 1.842993000  |
| N | 2.306986000  | -0.429437000 | -1.302554000 |
| H | 3.150096000  | -0.513192000 | -1.860087000 |
| H | 2.321889000  | 0.484485000  | -0.852041000 |
| H | 1.521433000  | -0.409539000 | -1.945138000 |
| N | 1.908894000  | 2.136816000  | 0.609877000  |
| H | 2.795871000  | 2.035126000  | 1.092392000  |
| H | 1.196926000  | 1.647961000  | 1.161699000  |
| H | 1.686689000  | 3.126745000  | 0.628521000  |
| N | -3.218933000 | 0.503003000  | 0.272620000  |
| H | -2.854688000 | -0.387482000 | -0.075363000 |
| H | -3.789000000 | 0.312337000  | 1.089692000  |
| H | -3.844558000 | 0.876915000  | -0.433166000 |
| N | -1.400450000 | -1.692013000 | -0.912882000 |
| H | -0.996941000 | -0.924564000 | -1.446725000 |
| H | -0.699633000 | -1.980534000 | -0.234135000 |
| H | -1.554563000 | -2.471224000 | -1.542797000 |
| N | -0.538983000 | 1.333823000  | -1.543269000 |
| H | 0.295885000  | 1.637197000  | -1.048559000 |
| H | -1.313106000 | 1.403294000  | -0.886781000 |
| H | -0.709308000 | 2.006257000  | -2.283503000 |

**(NH<sub>3</sub>)<sub>8</sub>: 3**

**MP2(full)/aug-cc-pVTZ = -451.89538 a.u.**

|   |              |              |              |
|---|--------------|--------------|--------------|
| N | -0.644833000 | -0.143185000 | 2.194329000  |
| H | -0.542288000 | 0.761956000  | 1.740743000  |
| H | -0.867232000 | 0.028281000  | 3.169438000  |
| H | -1.452653000 | -0.603218000 | 1.773132000  |
| N | -2.634772000 | -1.614962000 | 0.203407000  |
| H | -3.358700000 | -2.324144000 | 0.178208000  |
| H | -2.898353000 | -0.879176000 | -0.444324000 |
| H | -1.774118000 | -2.030357000 | -0.145429000 |
| N | -2.610078000 | 1.636695000  | -0.372078000 |
| H | -1.705056000 | 1.942343000  | -0.013281000 |
| H | -3.143318000 | 1.294033000  | 0.420294000  |
| H | -3.094770000 | 2.458011000  | -0.718401000 |
| N | 0.502423000  | 2.205780000  | 0.098057000  |
| H | 0.495761000  | 1.732423000  | -0.802961000 |
| H | 1.279859000  | 1.816497000  | 0.633694000  |
| H | 0.714379000  | 3.183731000  | -0.071419000 |
| N | 2.513884000  | 0.341319000  | 1.696447000  |
| H | 3.202512000  | 0.372289000  | 2.439794000  |
| H | 2.864602000  | -0.280701000 | 0.974892000  |
| H | 1.664266000  | -0.076438000 | 2.070104000  |
| N | 2.726205000  | -0.252264000 | -1.539242000 |
| H | 3.251620000  | -0.573062000 | -2.345672000 |
| H | 3.197492000  | 0.576754000  | -1.192659000 |
| H | 1.807392000  | 0.042959000  | -1.868701000 |
| N | -0.421150000 | 0.018111000  | -2.185714000 |
| H | -0.609148000 | -0.178762000 | -3.163463000 |
| H | -1.250203000 | 0.475693000  | -1.808618000 |
| H | -0.335504000 | -0.875762000 | -1.704228000 |
| N | 0.566555000  | -2.209660000 | -0.050200000 |
| H | 0.756246000  | -3.185483000 | 0.153650000  |
| H | 0.385807000  | -1.742575000 | 0.836879000  |
| H | 1.423772000  | -1.808121000 | -0.426719000 |
